# Supplementary material for: Chlamydia pneumoniae Infection in Mice Induces Chronic Lung Inflammation, iBALT Formation, and Fibrosis
Source: PubMed Central journal article supplement (PMC3808399; doi:10.1371/journal.pone.0077447), 2013-10-25
Supplement: pone.0077447.s002.pdf [file pone.0077447.s002.pdf]

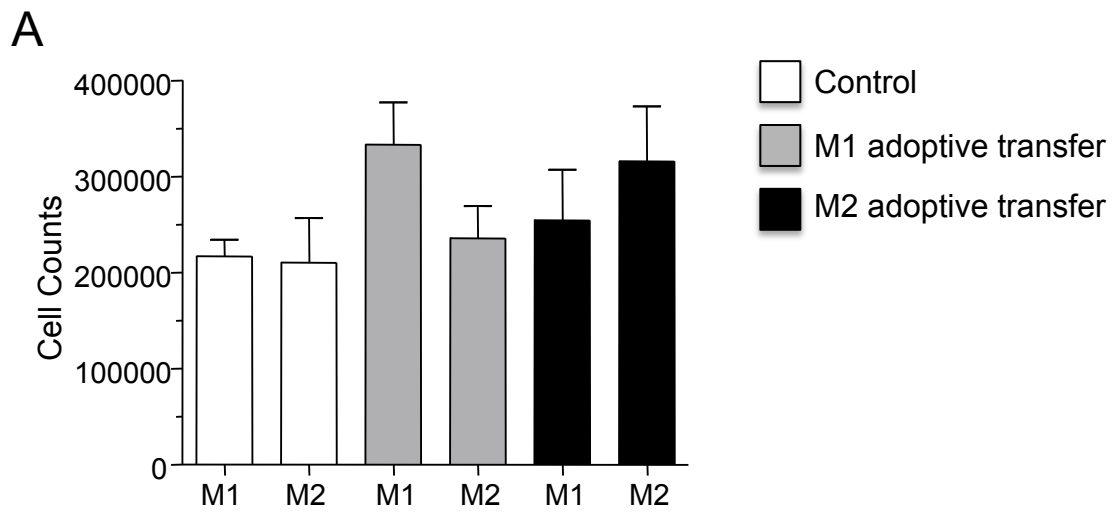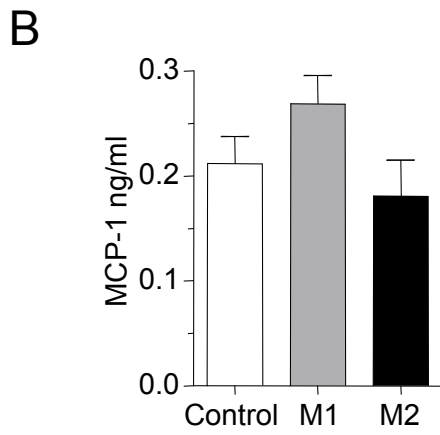

Figure S2
